# Supplementary material
Source: MDPI journal article supplement (https://www.mdpi.com/2571-6255/5/2/37)
Supplement: s1 [file s1]

## Supporting Information

*The grass fuel properties used for the fuel break*

**Table S1.** The specifications of the M-1 (mixed wood) and O-1b (grass) fuel types used in the Prometheus model.

| <b>M-1</b>              |                        | <b>O-1b (for landscape)</b> |                        | <b>O-1b (for WUI fuel break)</b> |                              |
|-------------------------|------------------------|-----------------------------|------------------------|----------------------------------|------------------------------|
| Tree height             | 13 m                   | degree of curing            | 60%                    | degree of curing                 | 10/30/50%                    |
| Canopy base height      | 6 m                    | fuel load                   | 3.5 t ha <sup>-1</sup> | fuel load                        | 1.7/3.5/7 t ha <sup>-1</sup> |
| Crown fuel load         | 0.8 kg m <sup>-2</sup> |                             |                        |                                  |                              |
| Foliar moisture content | 120%                   |                             |                        |                                  |                              |

### WRF model verification

Slightly underestimated 2-m air temperature and overestimated 2-m RH values in the WRF forecast model for the Jarbo Gap RAWS location in our study are in good agreement with the WRF simulation with 444 m horizontal grid spacing presented in [28].

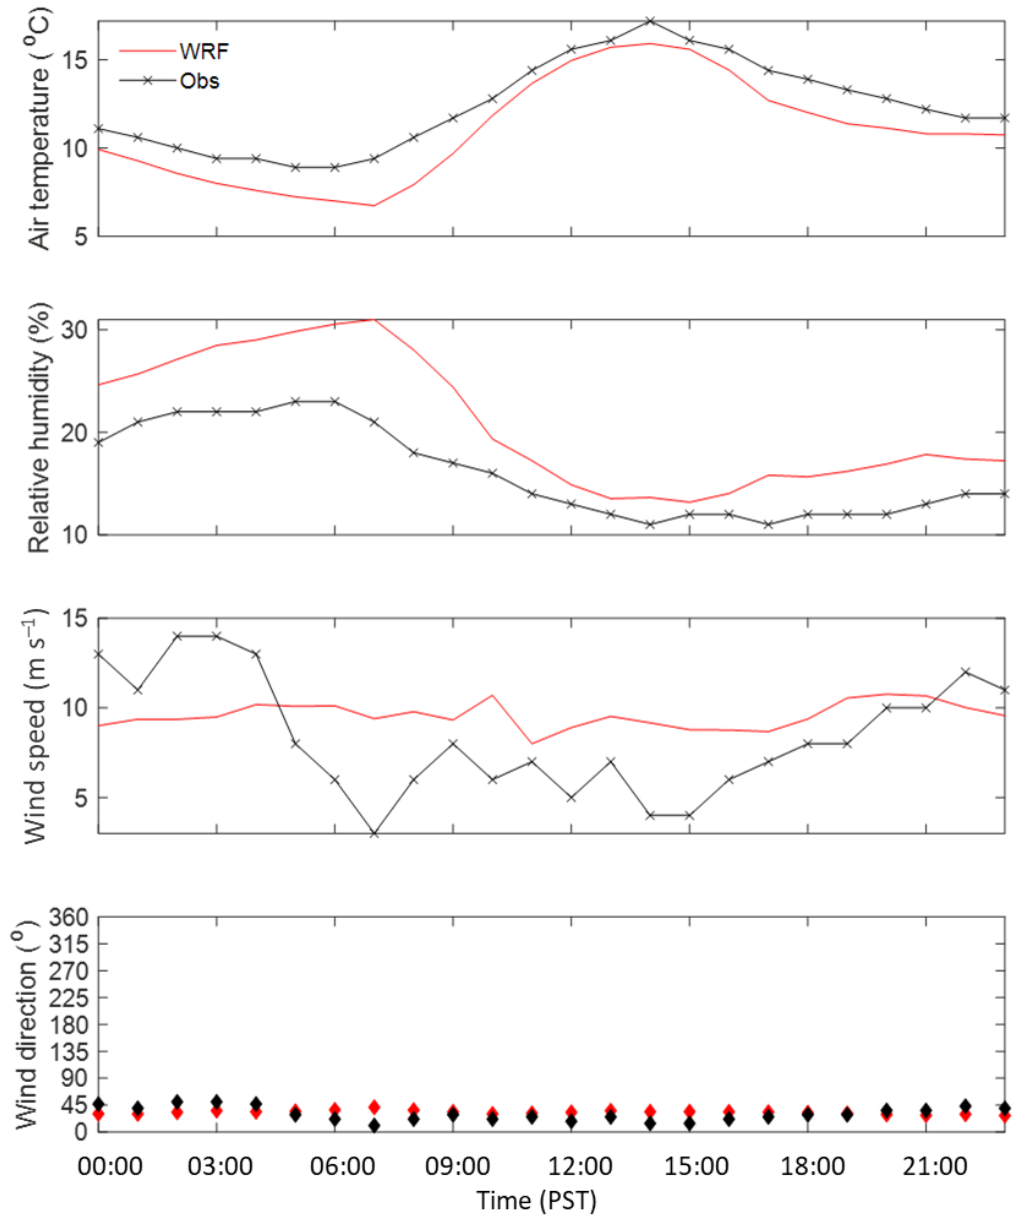

**Figure S1.** Observed weather data at Jarbo Gap weather station vs. WRF output at the nearest grid point for a sample diurnal cycle. The dashed red vertical line indicates approximate fire ignition time.

*Vertical wind profiles of the WRF simulation near the ignition point*

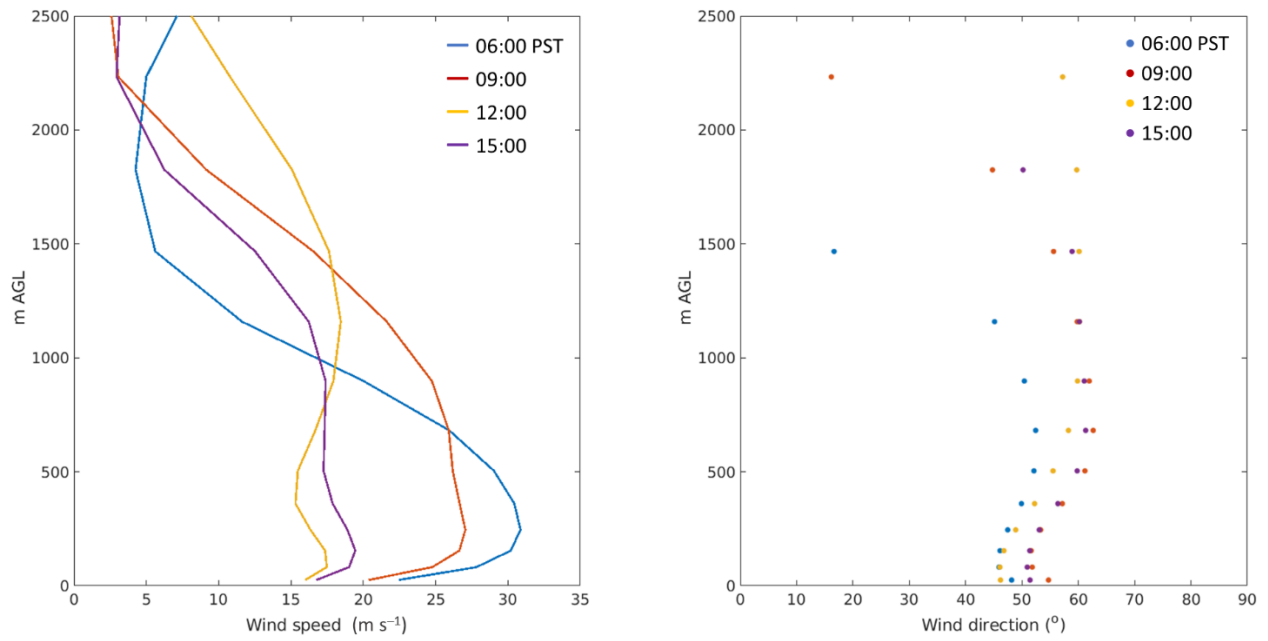

**Figure S2.** WRF simulation of vertical profiles of (left) wind speeds and (right) wind directions at the upwind weather stream location between 06:00 and 15:00 PST on 8 Nov 2018.

*Impact of non-burnable housing structures on fire spread simulations*

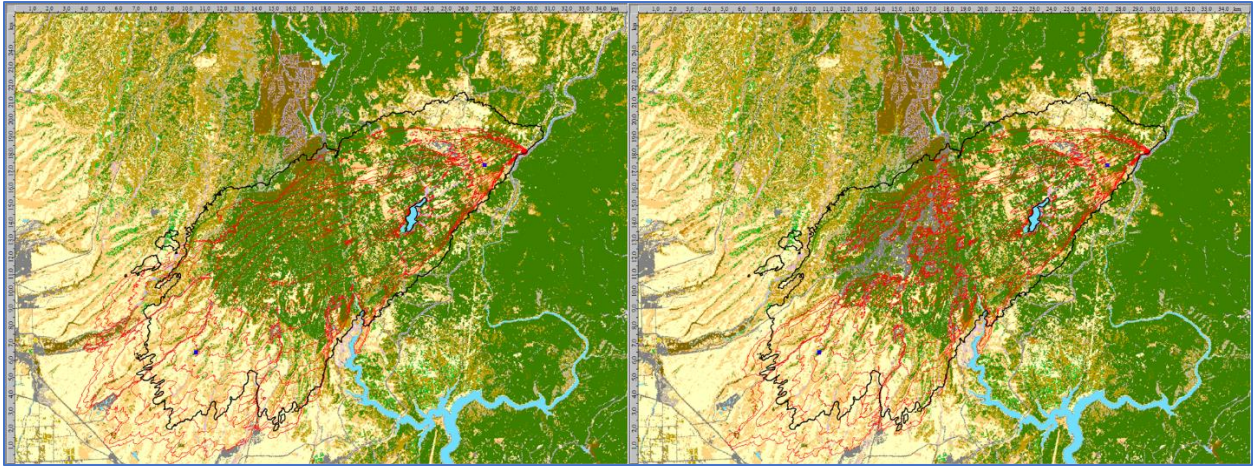

**Figure S3.** Fire growth simulations (red contour lines) using a fuel patch that replaced non-burnable fuel type (grey color) with a M-1 (90% percent conifer value) fuel type (left) and without a fuel patch (right). The solid black outline shows the observed burned perimeter at 18:00 PST.

Dominant fuel types inside the observed burn perimeter

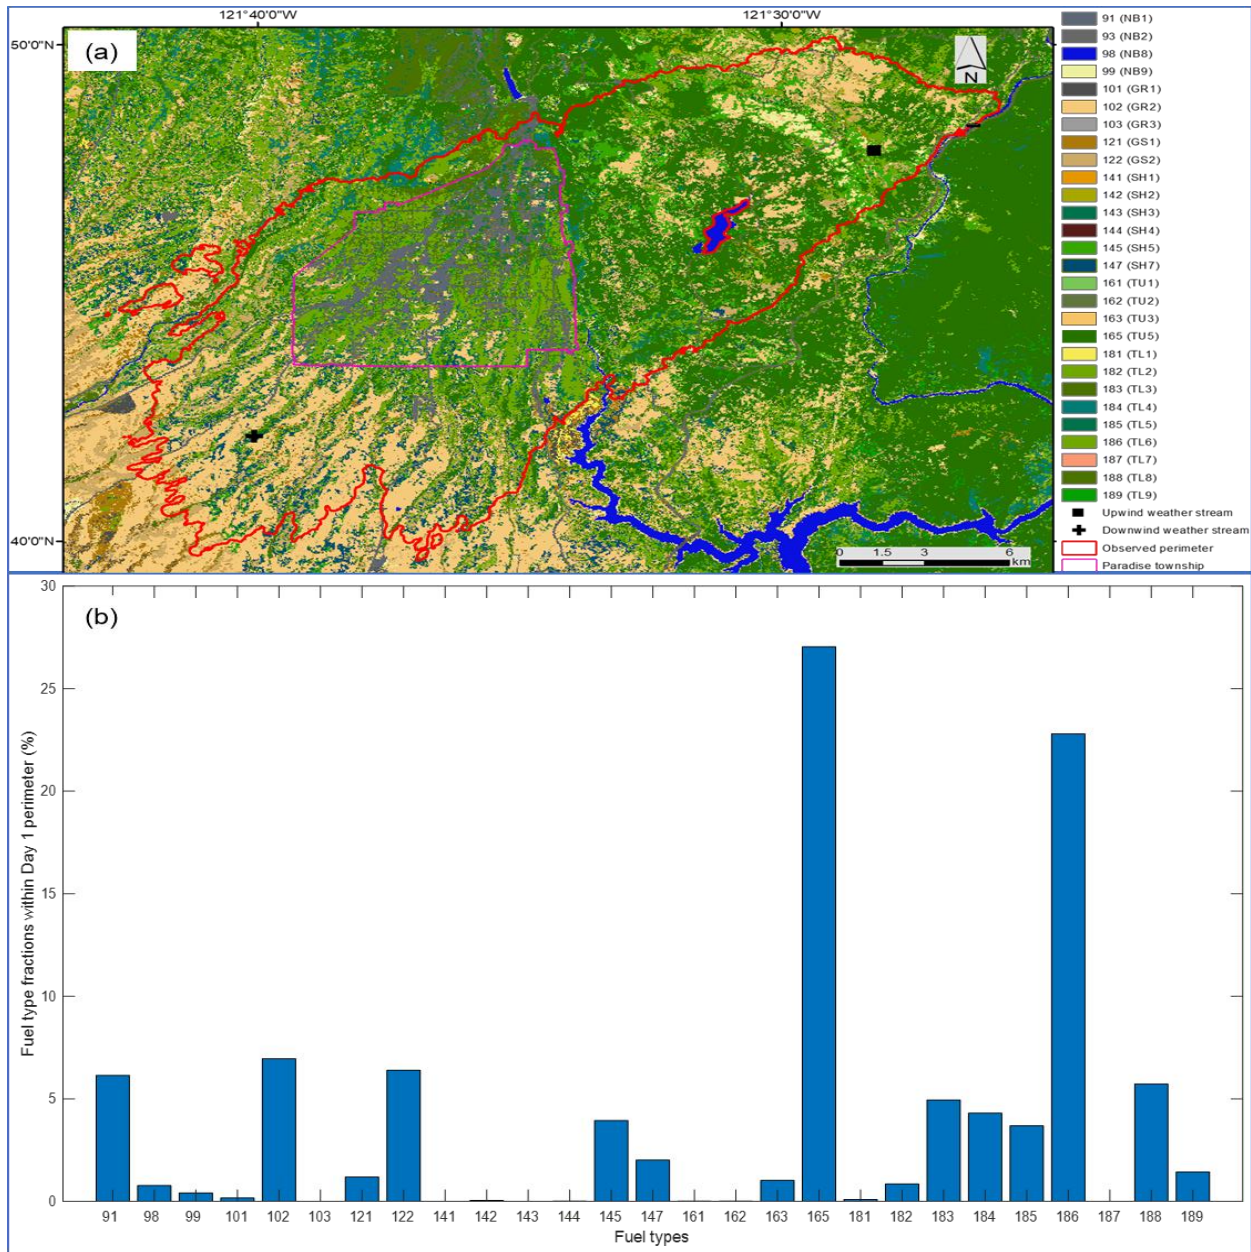

**Figure S4.** (a) Vegetation map of the study area created using Scott and Burgan fuel model data downloaded from the LANDFIRE website. (b) a fuel distribution inside the observed burn perimeter (red contour outline in (a)).

*Impact of FFMC on fire spread*

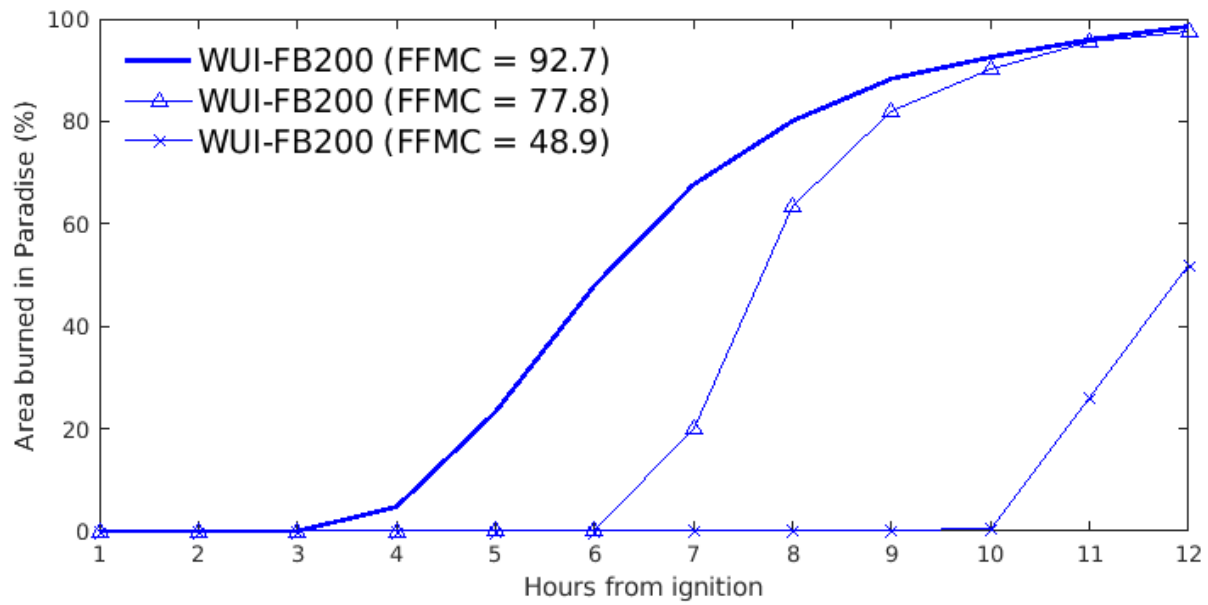

**Figure S5.** Percent of area burned in Paradise (inside the magenta polygon in Figure 1) vs. time after ignition in hours for the 200 m WUI fuel break runs with different FFMC values.
